## RESEARCH ARTICLE

## Phylogenetic analysis based on whole genome sequence of bovine leukemia virus in cattle under 3 years old with enzootic bovine leukosis

Masaki Maezawa<sup>1\*</sup>, Yuki Fujii<sup>2</sup>, Masataka Akagami<sup>2</sup>, Junko Kawakami<sup>2</sup>, Hisashi Inokuma<sup>1,3</sup>

**1** Laboratory of OSG Veterinary Science for Global Disease Management, Graduate School of Agricultural and Life Sciences, The University of Tokyo, Bunkyo-ku, Tokyo, Japan, **2** Ibaraki Prefecture Kenpoku Livestock Hygiene Service Center, Mito, Ibaraki, Japan, **3** Laboratory of Farm Animal Medicine, Graduate School of Agricultural and Life Sciences, The University of Tokyo, Bunkyo-ku, Tokyo, Japan

\* [amaezawa@g.ecc.u-tokyo.ac.jp](mailto:amaezawa@g.ecc.u-tokyo.ac.jp)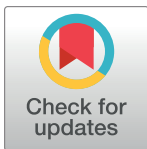

## OPEN ACCESS

**Citation:** Maezawa M, Fujii Y, Akagami M, Kawakami J, Inokuma H (2023) Phylogenetic analysis based on whole genome sequence of bovine leukemia virus in cattle under 3 years old with enzootic bovine leukosis. PLoS ONE 18(1): e0279756. <https://doi.org/10.1371/journal.pone.0279756>

**Editor:** Li Xing, Shanxi University, CHINA

**Received:** December 2, 2022

**Accepted:** December 11, 2022

**Published:** January 25, 2023

**Copyright:** © 2023 Maezawa et al. This is an open access article distributed under the terms of the [Creative Commons Attribution License](https://creativecommons.org/licenses/by/4.0/), which permits unrestricted use, distribution, and reproduction in any medium, provided the original author and source are credited.

**Data Availability Statement:** All genome sequences are available from the GenBank (<https://www.ncbi.nlm.nih.gov/genbank/>) database (accession numbers: LC733242 to LC733363).

**Funding:** This work was supported by Ito Foundation Grant Number 162 and Japan Society for the Promotion of Science KAKENHI Grant Numbers 20H03142 and 20J10567. The funders had no role in study design, data collection and analysis, decision to publish, or preparation of the manuscript.

## Abstract

Enzootic bovine leukosis (EBL) is one of bovine neoplasms caused by bovine leukemia virus (BLV). Although EBL is typically observed in cattle over 3 years old, several cases of EBL onset in cattle under 3 years old have been reported in Japan. The mechanism for EBL onset in young cattle remains unclear. Although genetic variation of BLV is limited, the variations could affect viral properties relating to BLV pathogenesis. The purpose of this study was to clarify relationship between early onset of EBL and BLV groups. Moreover, we also aimed to characterize BLV that cause early onset of EBL. Whole genome sequences of BLV in 72 EBL cattle under 3 years old and 50 EBL cattle over 3 years old were identified. Phylogenetic analysis showed that BLV was divided into 4 groups (A, B-1, B-2 and Other). The BLV from EBL cattle under 3 years old were mainly classified as group A and B-1, while those from EBL cattle over 3 years old were mainly included in group B-2. Common sequence of group A and B-1 was compared with those of group B-2. Specific sequences in LTRs, *gag-pro-pol*, *env* and *tax* gene regions were identified in these groups. Amino acid substitutions of Pro and Tax protein were predicted in those nucleotide sequences. Those genetic variations might contribute to the early onset of EBL.

## Introduction

Bovine leukemia virus (BLV) belongs to the family Retroviridae genus Deltaretrovirus and is the causative agent of enzootic bovine leukosis (EBL) [1]. Although almost all BLV-infected animals remain clinically asymptomatic throughout their lifespan, less than 5% of the infected cattle develop EBL [2]. Due to the lengthy latency period required by BLV, EBL is commonly seen in cattle older than 3 years [3], while onset of EBL in cattle under 3 years old has also been observed in Japan [4–6]. Although some factors related to onset of EBL in young cattle have been reported [6–8], the mechanism of early EBL onset is not fully understood.

**Competing interests:** I have read the journal's policy and the authors of this manuscript have the following competing interests: Laboratory of OSG Veterinary Science for Global Disease Management is an endowment laboratory, supported with a grant from OSG Corporation. This does not alter our adherence to PLOS ONE policies on sharing data and materials.

BLV has been previously classified into three groups (A, B, and C) based on the complete genome sequence, even though genetic variation in BLV is limited [9, 10]. Moreover, viral replication activity in groups A, B, and C were high, moderate, and low, respectively [10]. Because proviral and disease progression were positively correlated, the pathogenicity might be different among groups. In addition, a case of EBL caused by BLV classified as group A in young cattle has been reported [6]. However, the relationship between early onset of EBL and BLV groups has been unclear. In the present study, we identified whole genome sequences of BLV in EBL cattle under and over 3 years of age and performed phylogenetic analysis to clarify the relationship between BLV groups and the age of EBL onset.

## Materials and methods

### EBL samples

Several organs from 122 cattle with suspicions of bovine lymphoma were provided by meat hygiene inspection centers and Livestock Hygiene Service Centers in Ibaraki, Iwate and Hokkaido, Japan. Samples included lymph nodes (mediastinal, superficial, subiliac, medial, and iliac lymph nodes), spleen, and solid tumors in several organs (heart, lung, abomasum, liver, kidney, and uterus) in 72 cattle under 3 years old and 50 cattle over 3 years old (S1 and S2 Tables). Pathological findings and/or B-cell clonality test confirmed the presence of B-cell lymphoma in all cattle [11]. BLV copy numbers in all cattle were over 2,000 per 50 ng DNA used as the diagnostic criterion for BLV associated with tumor development in a previous study [4]. Genomic DNA was extracted from the tissues using QIAamp DNA Mini Kit (QIAGEN, GmbH, Hilden, Germany) and stored at -30°C.

### Sequencing of the BLV proviral genome

The genomic DNA was used as a template for the PCR, which was performed using PrimeSTAR<sup>®</sup> GXL DNA polymerase (Takara Bio, Shiga, Japan) and two primer pairs (BLV 1–17 F: 5′-TGTATGAAAGATCATGC-3′ and BLV 4565–4586 R: 5′-AATCTGATTGTGAGTCCA GAGG-3′, and BLV 4416–4436 F: 5′-CAGTTCGGAGTTTCCCTTTCT-3′ and BLV 8703–8720 R: 5′-TGTTTGCCGGTCTCTCCT-3′) [10]. The PCR reaction was as follows: amplification with 30 cycles of denaturation at 98°C for 10 sec, annealing at 55°C for 15 sec and extension at 68°C for 5 min, and final extension at 68°C for 2 min. PCR products were treated with ExoSAP-IT Express (Thermo Fisher Scientific, Waltham, MA, USA). DNA libraries were prepared using QIAGEN<sup>®</sup> QIAseq FX DNA Library Kit (QIAGEN) following the manufacturer's protocol and sequenced on an Illumina iSeq system using 2 × 150 bp paired-end reads. Quality control procedures were performed using the Trim Reads tool in the CLC Genomics Workbench v. 20.0 (CLC bio, Aarhus, Denmark) (CLC). Unless otherwise stated, all software was used with default values applied. Mapping of quality filtered reads against a reference BLV genome (Accession No. EF600696.1) was performed using the CLC mapping tool and the whole genome sequence of BLV in all samples was identified. Coverages of all samples were over 100. The whole BLV genome sequences of the 122 BLV identified in this study were deposited in the GenBank database under the accession numbers LC733242 to LC733363.

### Phylogenetic analysis

A phylogenetic tree was constructed by neighbor-joining methods (1,000 bootstrap replications) using the whole genome sequence of BLV in all samples and complete genome sequences of BLV obtained from GenBank database under accession numbers LC164086 and



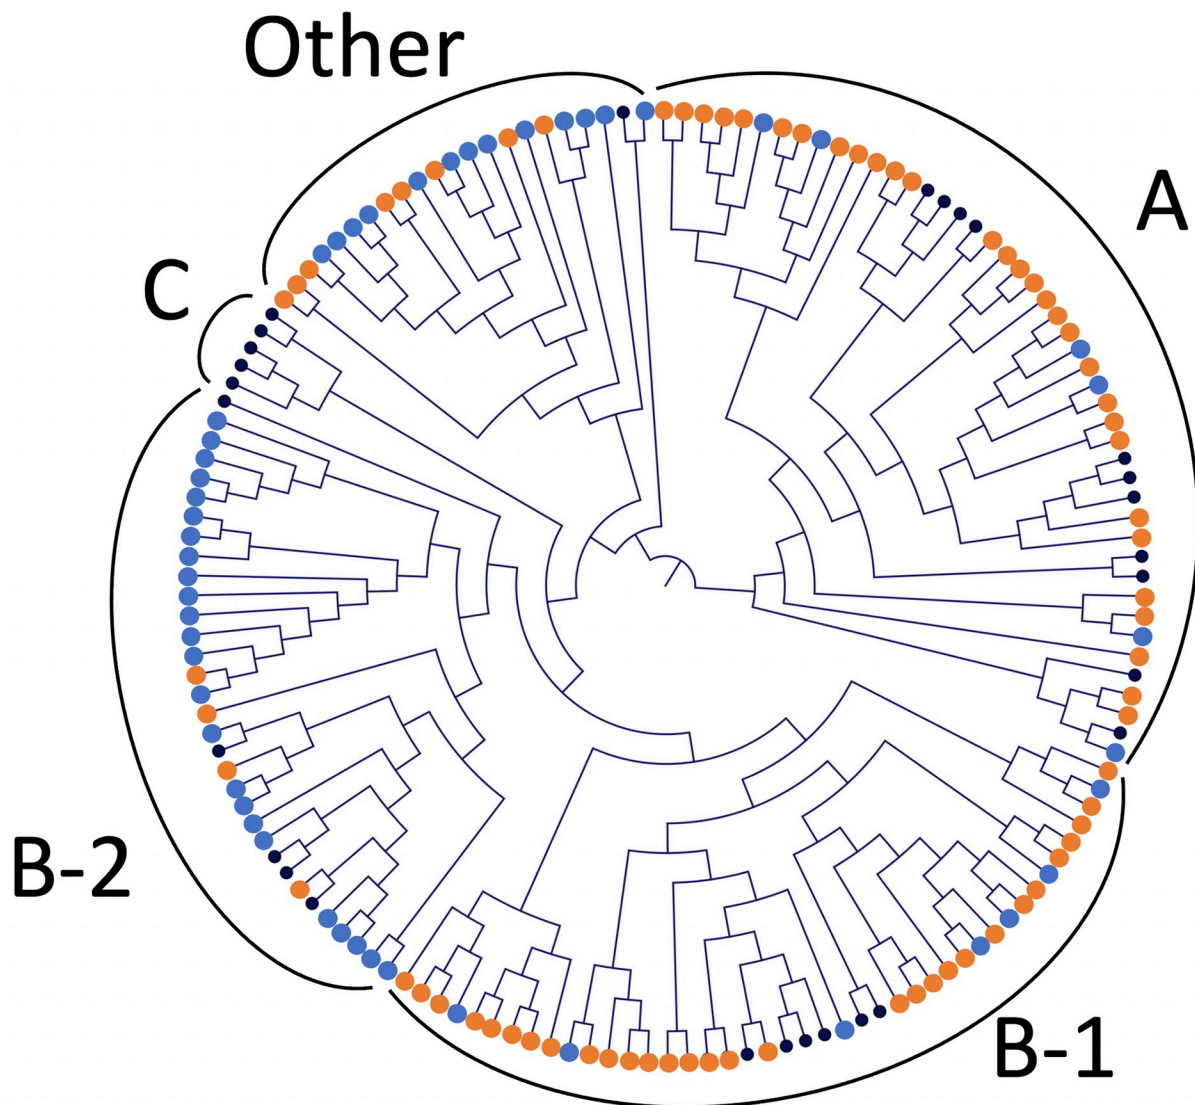

**Fig 2. Phylogenetic analysis of the whole BLV genome sequences.** A maximum-likelihood phylogenetic tree was constructed from whole BLV genome sequences of 72 EBL cattle under 3 years old, 50 EBL cattle over 3 years old and 28 reference sequences. The BLV were divided into 5 groups (A, B-1, B-2, C and Other). BLV from EBL cattle under 3 years old, EBL cattle over 3 years old and references were shown by red, blue and black circles, respectively.

<https://doi.org/10.1371/journal.pone.0279756.g002>

### Analysis of nucleotide and amino acid sequences

To identify specific nucleotide substitutions between BLV genomes from EBL cattle under and over 3 years old, the common sequence of group A and B-1 was compared with those of group B-2. The specific nucleotide substitutions were identified in the nucleotide position at 27 (A and B-1: cytosine and B-2: adenine), 853 (A and B-1: thymine and B-2: cytosine), 877 (A and B-1: guanine and B-2: adenine), 2275 (A and B-1: guanine and B-2: adenine), 3200 (A and B-1: thymine and B-2: cytosine), 4118 (A and B-1: thymine and B-2: cytosine), 4349 (A and B-1: thymine and B-2: cytosine), 5224 (A and B-1: cytosine and B-2: thymine), 5878 (A and B-1: cytosine and B-2: thymine), 6978 (A and B-1: thymine and B-2: adenine), 7945 (A and B-1: thymine and B-2: cytosine), 7946 (A and B-1: thymine and B-2: cytosine) and 8216 (A and B-



| Sample name | Group | Nucleotide position |    |     |             |     |     |      |      |      |      |      |      |      |      |      |      |      |      |      |      |      |        |      |   |
|-------------|-------|---------------------|----|-----|-------------|-----|-----|------|------|------|------|------|------|------|------|------|------|------|------|------|------|------|--------|------|---|
|             |       | 5'-LTR              |    |     | gag-pro-pol |     |     |      |      |      |      | env  |      |      |      |      |      |      |      | tax  |      |      | 3'-LTR |      |   |
|             |       | 1                   | 27 | 531 | 629         | 853 | 877 | 2275 | 3200 | 4118 | 4349 | 4880 | 5224 | 5878 | 6373 | 6978 | 6978 | 7252 | 7945 | 7946 | 8177 | 8190 | 8216   | 8720 |   |
| Reference   | -     | T                   | C  | A   | A           | T   | G   | G    | T    | T    | T    | A    | C    | C    | A    | T    | T    | C    | T    | T    | A    | T    | C      | A    |   |
| YEBL12      | A     | .                   | .  | .   | .           | .   | .   | .    | .    | .    | .    | .    | .    | .    | .    | .    | .    | .    | .    | .    | .    | .    | .      | .    |   |
| YEBL33      |       | .                   | .  | .   | .           | .   | .   | .    | .    | .    | .    | .    | .    | .    | .    | .    | .    | .    | .    | .    | .    | .    | .      | .    |   |
| YEBL64      |       | .                   | .  | .   | .           | .   | .   | .    | .    | .    | .    | .    | .    | .    | .    | .    | .    | .    | .    | .    | .    | .    | .      | .    |   |
| YEBL20      | B-1   | .                   | .  | .   | .           | .   | .   | .    | .    | .    | .    | .    | .    | .    | .    | .    | .    | .    | .    | .    | .    | .    | .      | .    |   |
| YEBL49      |       | .                   | .  | .   | .           | .   | .   | .    | .    | .    | .    | .    | .    | .    | .    | .    | .    | .    | .    | .    | .    | .    | .      | .    |   |
| YEBL72      |       | .                   | .  | .   | .           | .   | .   | .    | .    | .    | .    | .    | .    | .    | .    | .    | .    | .    | .    | .    | .    | .    | .      | .    |   |
| AEBL17      | B-2   | .                   | A  | .   | .           | C   | A   | A    | C    | C    | C    | .    | T    | T    | .    | A    | A    | .    | C    | C    | .    | .    | A      | .    |   |
| AEBL21      |       | .                   | A  | .   | .           | C   | A   | A    | C    | C    | C    | .    | T    | T    | .    | A    | A    | .    | C    | C    | .    | .    | A      | .    |   |
| AEBL25      |       | .                   | A  | .   | .           | C   | A   | A    | C    | C    | C    | .    | T    | T    | .    | A    | A    | .    | C    | C    | .    | .    | A      | .    |   |
| YEBL41      | Other | .                   | .  | .   | .           | .   | .   | .    | .    | .    | C    | .    | .    | .    | .    | .    | .    | .    | .    | .    | .    | .    | .      | .    |   |
| AEBL23      |       | .                   | .  | .   | .           | .   | .   | .    | .    | .    | C    | .    | .    | .    | .    | .    | .    | .    | .    | .    | .    | .    | .      | .    |   |
| AEBL26      |       | .                   | .  | .   | .           | .   | .   | .    | .    | .    | C    | .    | .    | .    | .    | .    | .    | .    | .    | .    | .    | .    | .      | .    | . |

**Fig 3. Summary of representative nucleotide substitutions among groups A, B-1, B-2 and Other.** The dots (".") indicate the same nucleotide.

<https://doi.org/10.1371/journal.pone.0279756.g003>

1: cytosine and B-2: adenine) (Fig 3). These nucleotide substitutions were located in 5' and 3' long terminal repeat (LTR), *gag-pro-pol*, *env* and *tax* regions. The substitutions of nucleotide position at 2275, 7945 and 7946 were predicted to cause amino acid substitution at the positions 158 of Pro (A and B-1: alanine and B-2: threonine) and 233 of Tax protein (A and B-1: leucine and B-2: proline) while the other nucleotide substitutions were not expected to affect amino acids.

## Discussion

BLV can be divided into three groups (A, B, and C) based on the whole genome sequence, and the difference of viral transmissibility among those groups has been reported [10]. However, there are few studies about pathogenicity among the group and the relationship between BLV groups and the age of EBL onset is unclear. In the present study, the BLV from EBL cattle under 3 years old were mainly classified as group A and B-1, while those from EBL cattle over 3 years old were mainly classified as group B-2. Therefore, the pathogenicity of BLV from group A and B-1 might be higher than those from group B-2. Moreover, no BLV from EBL cattle were classified as group C in the present study, and BLV in group C were isolated only from cattle without EBL in the previous study [10]. Those results indicated that the pathogenicity of BLV in group C might be low.

In the BLV genome, several functional genes and regions are contained [13, 14]. Both the 5' and 3' extremities of BLV genome present a sequence called LTR which includes transcriptional regulatory sequences and a point mutation in LTR region affects viral activity [15]. BLV has the *gag-pro-pol*, *env* and nonstructural genes from 5' and 3' of the genome. The *gag*, *pro*, *pol*, and *env* genes encode the internal structural proteins of the virion, the viral protease, the reverse transcriptase, and the envelope glycoproteins of the virion, respectively. The nonstructural genes *R3*, *G4*, *tax*, and *rex* are encoded within the *pX* region which is located between the *env* and 3' LTR. Proteolytic processing at specific sites in the Gag protein and Gag-Pro-Pol precursors by the viral protease is an essential step in the viral life cycle [16]. The Tax protein functions as a transactivator of viral gene transcription and modulates the expression of several cellular genes. Therefore, the Tax protein is considered to play a crucial role in the leukemogenesis caused by deltaretroviruses [17–19]. The latency period of BLV encoding a proline at

residue 233 of the Tax protein (P233-Tax) is approximately 2 years longer than that of BLV encoding L233-Tax [20]. In the present study, the substitutions of nucleotide sequence at LTRs, *pro* and *tax* were identified between common sequence of group A and B-1 and those of group B-2. Moreover, amino acid mutations of Pro and Tax protein were induced by nucleotide sequence substitutions. Those genetic variations might contribute to onset of EBL in young cattle.

Human T-cell leukemia virus type 1 (HTLV-1), closely related to BLV, has been implicated in adult T-cell lymphoma (ATL). Inactivation of the tax gene expression were observed by genetic and epigenetic alterations, including DNA methylation, histone modification, and deletion of the 5'-LTR in some ATL cells [21–25]. In more than half of ATL cases, two types of defective HTLV-1 proviral genomes were found [21]. The first defective type retained both LTRs and lacked internal sequences and the second defective type lacked 5'-LTR and internal sequences [21]. 5'-LTR is critical for transcription of viral genes, and the loss indicates that viral proteins, including Tax protein, cannot be transcribed from viral promoter in these cells. Even cells with the second defective type HTLV-1 provirus were found not to produce Tax protein in vitro [26]. The lack of Tax protein expression was also observed in majority of BLV-induced malignancies [27]. In the present study, defective BLV proviral genome including *tax* gene and 3'-LTR region were identified in only YEBL47. Moreover, no 5'-LTR region defect was observed in all BLV. The different frequency and regions of defects between BLV and HTLV-1 suggested that both viruses might have different strategies for suppressing *tax* gene expression. Further studies are needed to clarify the mechanism to silence the *tax* gene transcription in BLV.

In conclusion, the present study demonstrated BLV with propensity for onset of EBL in cattle under 3 years old. Moreover, specific sequences in LTRs, *gag-pro-pol*, *env* and *tax* gene regions were identified in these BLV. Amino acid substitution of *pro* and *tax* were predicted in these nucleotide sequences. However, the influence of each of these genetic variants on pathogenicity of BLV was not evaluated in the present study. Further investigation is required to clarify the relationship between pathogenesis and these genetic variants.

## Supporting information

**S1 Table. BLV strains in EBL cattle under 3 years old.**  
(PDF)

**S2 Table. BLV strains in EBL cattle over 3 years old.**  
(PDF)

## Acknowledgments

We thank the veterinarians of Ibaraki and Iwate Livestock Hygiene Service Center and Tokachi and Hayakita Meat Hygiene Inspection Centers for sampling.

## Author Contributions

**Conceptualization:** Masaki Maezawa.

**Data curation:** Masaki Maezawa.

**Formal analysis:** Masaki Maezawa.

**Funding acquisition:** Masaki Maezawa, Hisashi Inokuma.

**Investigation:** Masaki Maezawa, Yuki Fujii, Masataka Akagami, Junko Kawakami.

**Methodology:** Masaki Maezawa, Yuki Fujii.

**Project administration:** Masaki Maezawa.

**Resources:** Masaki Maezawa, Junko Kawakami, Hisashi Inokuma.

**Supervision:** Masaki Maezawa.

**Writing – original draft:** Masaki Maezawa.

**Writing – review & editing:** Masaki Maezawa, Yuki Fujii, Masataka Akagami, Junko Kawakami, Hisashi Inokuma.

## References

- Schwartz I, Lévy D. Pathobiology of bovine leukemia virus. *Vet Res.* 1994; 25: 521–536. PMID: [7889034](#)
- Florins A, Boxus M, Vandermeers F, Bouzar O, Defoiche AB, Hubaux J, et al. Emphasis on cell turnover in two hosts infected by bovine leukemia virus: a rationale for host susceptibility to disease. *Vet Immunol Immunopathol.* 2008; 125: 1–7. <https://doi.org/10.1016/j.vetimm.2008.04.007> PMID: [18513803](#)
- Gutiérrez G, Alvarez I, Merlini R, Rondelli F, Trono K. Dynamics of perinatal bovine leukemia virus infection. *BMC Vet Res.* 2014; 10: 82. <https://doi.org/10.1186/1746-6148-10-82> PMID: [24708791](#)
- Nishimori A, Konnai S, Okagawa T, Maekawa N, Goto S, Ikebuchi R, et al. Identification of an atypical enzootic bovine leukosis in Japan by using a novel classification of bovine leukemia based on immunophenotypic analysis. *Clin Vaccine Immunol.* 2017; 24: e00067–17. <https://doi.org/10.1128/CVI.00067-17> PMID: [28659325](#)
- Oguma K, Suzuki M, Sentsui H. Enzootic bovine leukosis in a two-month-old calf. *Virus Res.* 2017; 233: 120–124. <https://doi.org/10.1016/j.virusres.2017.03.016> PMID: [28330779](#)
- Maezawa M, Sakaguchi K, Tagaino Y, Fujii Y, Akagami M, Kawakami J, et al. Enzootic bovine leukosis in a 21-month-old Japanese Black cow with high susceptibility. *J Vet Diagn Invest.* 2022; 34: 733–737.
- Maezawa M, Inokuma H. Analysis of bovine leukemia virus integration sites in cattle under 3 years old with enzootic bovine leukosis. *Arch Virol.* 2020; 165: 179–183.
- Maezawa M, Watanabe K, Matsumoto K, Kobayashi Y, Ogawa H, Inokuma H. Analysis of the bone morphogenetic protein 6 gene promoter region in young beef cattle affected by enzootic bovine leukosis. *J Vet Med Sci.* 2021; 83: 898–904. <https://doi.org/10.1292/jvms.20-0663> PMID: [33840719](#)
- Mansky LM, Temin HM. Lower mutation rate of bovine leukemia virus relative to that of spleen necrosis virus. *J Virol.* 1994; 68: 494–499. <https://doi.org/10.1128/JVI.68.1.494-499.1994> PMID: [8254760](#)
- Murakami H, Uchiyama J, Suzuki C, Nikaido S, Shibuya K, Sato R, et al. Variations in the viral genome and biological properties of bovine leukemia virus wild-type strains. *Virus Res.* 2018; 253: 103–111. <https://doi.org/10.1016/j.virusres.2018.06.005> PMID: [29913249](#)
- Maezawa M, Watanabe K, Horiuchi N, Matsumoto K, Kobayashi Y, Inokuma H. Molecular diagnosis of bovine B-cell lymphoma using polymerase chain reaction for immunoglobulin heavy chain gene. *J Vet Med Sci.* 2020; 82: 61–63. <https://doi.org/10.1292/jvms.19-0418> PMID: [31801928](#)
- Kumar S, Stecher G, Tamura K. MEGA7: molecular evolutionary genetics analysis version 7.0 for bigger datasets. *Mol Biol Evol.* 2016; 33: 1870–1874. <https://doi.org/10.1093/molbev/msw054> PMID: [27004904](#)
- Aida Y, Murakami H, Takahashi M, Takeshima SN. Mechanisms of pathogenesis induced by bovine leukemia virus as a model for human T-cell leukemia virus. *Front Microbiol.* 2013; 4: 328. <https://doi.org/10.3389/fmicb.2013.00328> PMID: [24265629](#)
- Durkin K, Rosewick N, Artesi M, Hahaut V, Griebel P, Arsic N, et al. Characterization of novel Bovine Leukemia Virus (BLV) antisense transcripts by deep sequencing reveals constitutive expression in tumors and transcriptional interaction with viral microRNAs. *Retrovirology.* 2016; 13: 33. <https://doi.org/10.1186/s12977-016-0267-8> PMID: [27141823](#)
- Murakami H, Todaka H, Uchiyama J, Sato R, Sogawa K, Sakaguchi M, et al. A point mutation to the long terminal repeat of bovine leukemia virus related to viral productivity and transmissibility. *Virol.* 2019; 537: 45–52.
- Perach M, Hizi A. Catalytic features of the recombinant reverse transcriptase of bovine leukemia virus expressed in bacteria. *Virol.* 1999; 259: 176–189. <https://doi.org/10.1006/viro.1999.9761> PMID: [10364502](#)

17. Tanaka A, Takahashi C, Yamaoka S, Nosaka T, Maki M, Hatanaka M. Oncogenic transformation by the tax gene of human T-cell leukemia virus type I in vitro. *Proc Natl Acad Sci USA*. 1990; 87: 1071–1075. <https://doi.org/10.1073/pnas.87.3.1071> PMID: 2300570
18. Grassmann R, Berchtold S, Radant I, Alt M, Fleckenstein B, Sodroski JG, et al. Role of human T-cell leukemia virus type 1 X region proteins in immortalization of primary human lymphocytes in culture. *J Virol*. 1992; 66: 4570–4575. <https://doi.org/10.1128/JVI.66.7.4570-4575.1992> PMID: 1351105
19. Szynal M, Cleuter Y, Beskorwayne T, Bagnis C, Lint VC, Kerkhofs P, et al. Disruption of B-cell homeostatic mediated by the BLV-Tax oncoprotein: association with upregulation of Bcl-2 and signaling through NF-kB. *Oncogene*. 2003; 22: 4531–4542.
20. Inoue E, Matsumura K, Soma N, Hirasawa S, Wakimoto M, Arakaki Y, et al. L233P mutation of the Tax protein strongly correlated with leukemogenicity of bovine leukemia virus. *Vet Microbiol*. 2013; 167: 364–371. <https://doi.org/10.1016/j.vetmic.2013.09.026> PMID: 24139177
21. Tamiya S, Matsuoka M, Etoh K, Watanabe T, Kamihira S, Yamaguchi K, et al. Two Types of Defective Human T-Lymphotropic Virus Type I Provirus in Adult T-Cell Leukemia. *Blood*. 1996; 88: 3065–3073. PMID: 8874205
22. Koiwa T, Hamano-Usami A, Ishida T, Okayama A, Yamaguchi K, Kamihira S, et al. 5'-long terminal repeat-selective CpG methylation of latent human T-cell leukemia virus type 1 provirus in vitro and in vivo. *J Virol*. 2002; 76: 9389–97. <https://doi.org/10.1128/jvi.76.18.9389-9397.2002> PMID: 12186921
23. Takeda S, Maeda M, Morikawa S, Taniguchi Y, Yasunaga J, Nosaka K, et al. Genetic and epigenetic inactivation of tax gene in adult T- cell leukemia cells. *Int J Cancer*. 2004; 109: 559–67. <https://doi.org/10.1002/ijc.20007> PMID: 14991578
24. Taniguchi Y, Nosaka K, Yasunaga J, Maeda M, Mueller N, Okayama A, et al. Silencing of human T-cell leukemia virus type I gene transcription by epigenetic mechanisms. *Retrovirology*. 2005; 2: 64. <https://doi.org/10.1186/1742-4690-2-64> PMID: 16242045
25. Kannagi M, Ohashi T, Harashima N, Hanabuchi S, Hasegawa A. Immunological risks of adult T-cell leukemia at primary HTLV-I infection. *Trends Microbiol*. 2004; 12: 346–352. <https://doi.org/10.1016/j.tim.2004.05.005> PMID: 15223062
26. Sakurai H, Kondo N, Ishiguro N, Mikuni C, Ikeda H, Wakisaka A, et al. Molecular analysis of a HTLV-I pX defective human adult T-cell leukemia. *Leuk Res*. 1992; 16: 941–946. [https://doi.org/10.1016/0145-2126\(92\)90040-e](https://doi.org/10.1016/0145-2126(92)90040-e) PMID: 1405724
27. Merimi M, Klener P, Szynal M, Cleuter Y, Bagnis C, Kerkhofs P, et al. Complete suppression of viral gene expression is associated with the onset and progression of lymphoid malignancy: observations in Bovine Leukemia Virus-infected sheep. *Retrovirology*. 2007; 4: 51. <https://doi.org/10.1186/1742-4690-4-51> PMID: 17645797
